# Supplementary material for: Wei2GO: weighted sequence similarity-based protein function prediction
Source: PeerJ journal article supplement (doi:10.7717/peerj.12931), 2022-02-15

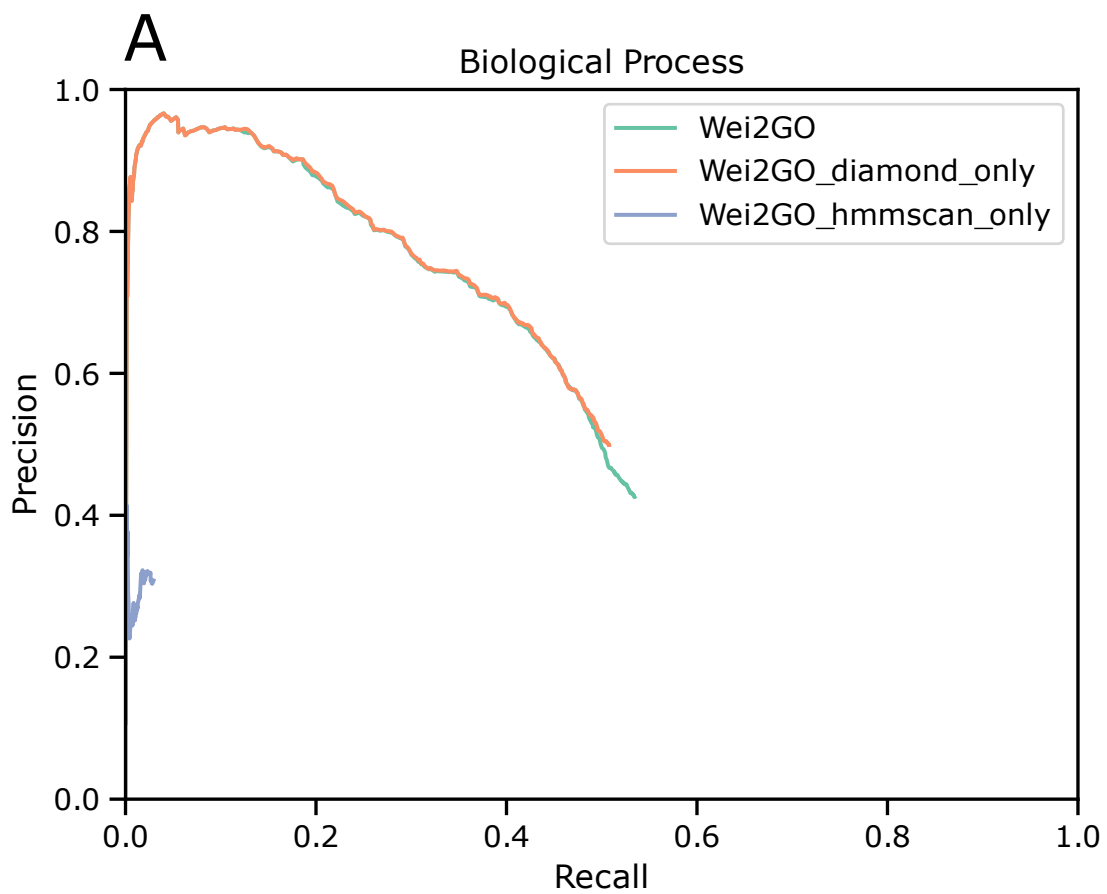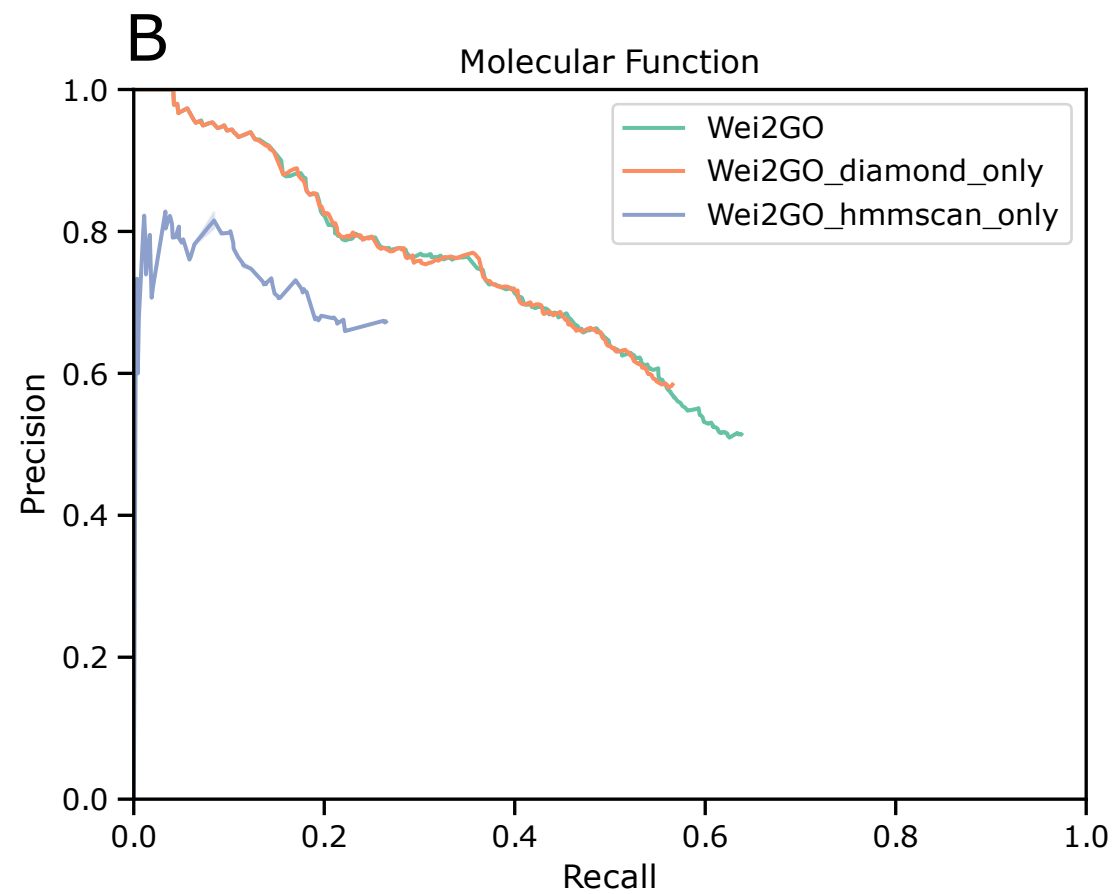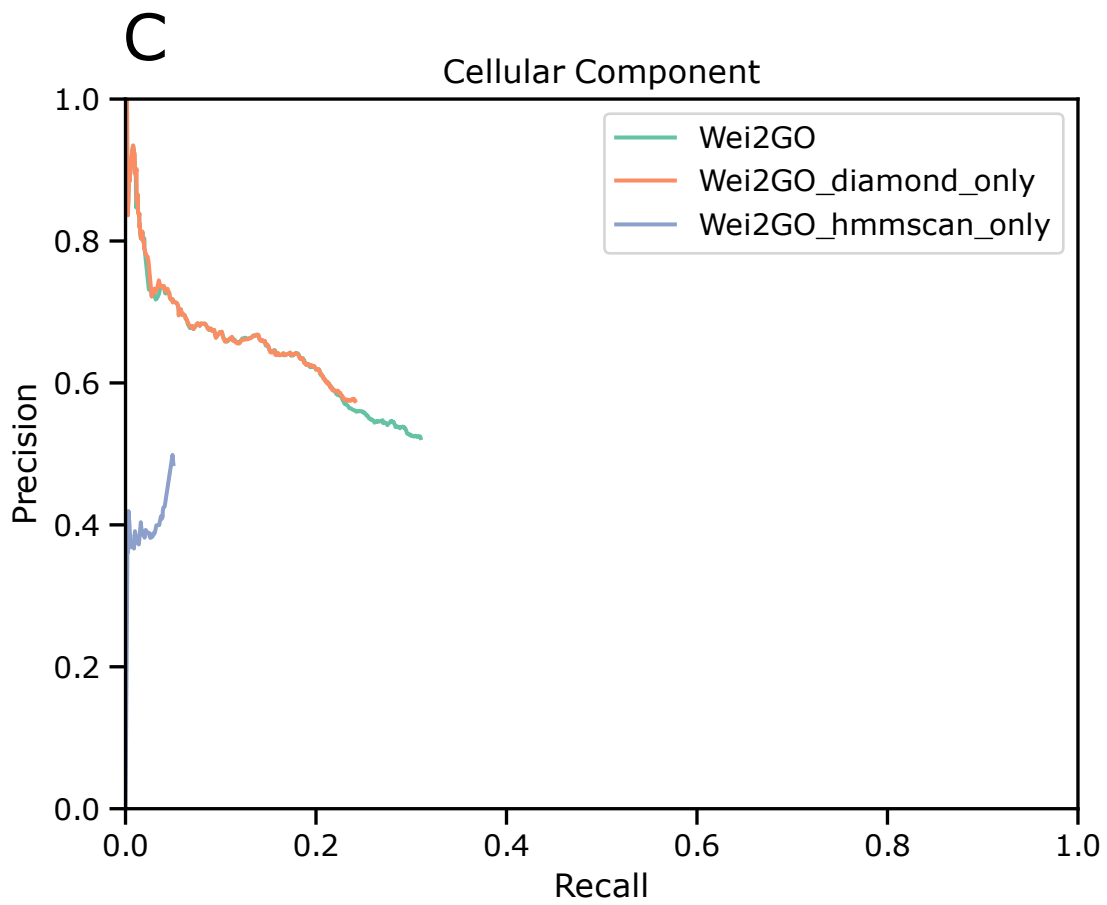

Supplement: supplementary_fig1.pdf [file supplementary_fig1.pdf]
